---

# Nucleic Acids Research

---

## Contents

Volume 36, Web Server issue, July 1, 2008

---

|                                                                                                                                                  |                                                                                                                                                |         |
|--------------------------------------------------------------------------------------------------------------------------------------------------|------------------------------------------------------------------------------------------------------------------------------------------------|---------|
| <b>Editorial</b>                                                                                                                                 | G.Benson                                                                                                                                       | W1      |
| <b>Keeping pace with the data: 2008 update on the Bioinformatics Links Directory</b>                                                             | M.D.Brazas, J.A.Fox, T.Brown, S.McMillan and B.F.F.Ouellette                                                                                   | W2–W4   |
| <b>NCBI BLAST: a better web interface</b>                                                                                                        | M.Johnson, I.Zaretskaya, Y.Raytselis, Y.Merezhuk, S.McGinnis and T.L.Madden                                                                    | W5–W9   |
| <b>R-Coffee: a web server for accurately aligning noncoding RNA sequences</b>                                                                    | S.Moretti, A.Wilm, D.G.Higgins, I.Xenarios and C.Notredame                                                                                     | W10–W13 |
| <b>MAGNOLIA: multiple alignment of protein-coding and structural RNA sequences</b>                                                               | A.Fontaine, A.de Monte and H.Touzet                                                                                                            | W14–W18 |
| <b>S</b> <b>SARSA: a web tool for structural alignment of RNA using a structural alphabet</b>                                                    | Y.-F.Chang, Y.-L.Huang and C.L.Lu                                                                                                              | W19–W24 |
| <b>SCANPS: a web server for iterative protein sequence database searching by dynamic programing, with display in a hierarchical SCOP browser</b> | T.P.Walsh, C.Webber, S.Searle, S.S.Sturrock and G.J.Barton                                                                                     | W25–W29 |
| <b>PROMALS3D web server for accurate multiple protein sequence and structure alignments</b>                                                      | J.Pei, M.Tang and N.V.Grishin                                                                                                                  | W30–W34 |
| <b>PVS: a web server for protein sequence variability analysis tuned to facilitate conserved epitope discovery</b>                               | M.Garcia-Boronat, C.M.Diez-Rivero, E.L.Reinherz and P.A.Reche                                                                                  | W35–W41 |
| <b>RAPIDO: a web server for the alignment of protein structures in the presence of conformational changes</b>                                    | R.Mosca and T.R.Schneider                                                                                                                      | W42–W46 |
| <b>Superimposé: a 3D structural superposition server</b>                                                                                         | R.A.Bauer, P.E.Bourne, A.Formella, C.Frömmel, C.Gille, A.Goede, A.Guerler, A.Hoppe, E.-W.Knapp, T.Pöschel, B.Wittig, V.Ziegler and R.Preissner | W47–W54 |
| <b>SuperPred: drug classification and target prediction</b>                                                                                      | M.Dunkel, S.Günther, J.Ahmed, B.Wittig and R.Preissner                                                                                         | W55–W59 |
| <b>DAhunter: a web-based server that identifies homologous proteins by comparing domain architecture</b>                                         | B.Lee and D.Lee                                                                                                                                | W60–W64 |
| <b>xREI: a phylo-grammar visualization webserver</b>                                                                                             | L.Barquist and I.Holmes                                                                                                                        | W65–W69 |
| <b>The Vienna RNA Websuite</b>                                                                                                                   | A.R.Gruber, R.Lorenz, S.H.Bernhart, R.Neuböck and I.L.Hofacker                                                                                 | W70–W74 |
| <b>Software.ncrna.org: web servers for analyses of RNA sequences</b>                                                                             | K.Asai, H.Kiryu, M.Hamada, Y.Tabei, K.Sato, H.Matsui, Y.Sakakibara, G.Terai and T.Mituyama                                                     | W75–W78 |
| <b>WAR: Webserver for aligning structural RNAs</b>                                                                                               | E.Torarinsson and S.Lindgreen                                                                                                                  | W79–W84 |
| <b>NOBAI: a web server for character coding of geometrical and statistical features in RNA structure</b>                                         | V.Knudsen and G.Caetano-Anollés                                                                                                                | W85–W90 |

*Continued*

|          |                                                                                                                                   |                                                                                                                                                                   |           |
|----------|-----------------------------------------------------------------------------------------------------------------------------------|-------------------------------------------------------------------------------------------------------------------------------------------------------------------|-----------|
| <b>S</b> | <b>RNAlogo: a new approach to display structural RNA alignment</b>                                                                | T.-H.Chang, J.-T.Horng and H.-D.Huang                                                                                                                             | W91–W96   |
| <b>S</b> | <b>AsiDesigner: exon-based siRNA design server considering alternative splicing</b>                                               | Y.-K.Park, S.-M.Park, Y.-C.Choi, D.Lee, M.Won and Y.J.Kim                                                                                                         | W97–W103  |
|          | <b>OligoWalk: an online siRNA design tool utilizing hybridization thermodynamics</b>                                              | Z.J.Lu and D.H.Mathews                                                                                                                                            | W104–W108 |
|          | <b>TargetRNA: a tool for predicting targets of small RNA action in bacteria</b>                                                   | B.Tjaden                                                                                                                                                          | W109–W113 |
| <b>S</b> | <b>pssRNAMiner: a plant short small RNA regulatory cascade analysis server</b>                                                    | X.Dai and P.X.Zhao                                                                                                                                                | W114–W118 |
|          | <b>RSAT: regulatory sequence analysis tools</b>                                                                                   | M.Thomas-Chollier, O.Sand, J.-V.Turatsinze, R.Janky, M.Defrance, E.Vervisch, S.Brohée and J.van Helden                                                            | W119–W127 |
| <b>S</b> | <b>ConTra: a promoter alignment analysis tool for identification of transcription factor binding sites across species</b>         | B.Hooghe, P.Hulpiau, F.van Roy and P.De Bleser                                                                                                                    | W128–W132 |
|          | <b>DiRE: identifying distant regulatory elements of co-expressed genes</b>                                                        | V.Gotea and I.Ovcharenko                                                                                                                                          | W133–W139 |
| <b>S</b> | <b>OREST: the online resource for EST analysis</b>                                                                                | B.Waegel, T.Schmidt, H.W.Mewes and A.Ruepp                                                                                                                        | W140–W144 |
|          | <b>CRISPRcompar: a website to compare clustered regularly interspaced short palindromic repeats</b>                               | I.Grissa, G.Vergnaud and C.Pourcel                                                                                                                                | W145–W148 |
|          | <b>Uprobe 2008: an online resource for universal overgo hybridization-based probe retrieval and design</b>                        | R.T.Sullivan, C.B.Morehouse, NISC Comparative Sequencing Program and J.W.Thomas                                                                                   | W149–W153 |
|          | <b>OligoHeatMap (OHM): an online tool to estimate and display hybridizations of oligonucleotides onto DNA sequences</b>           | O.Croce, F.Chevenet and R.Christen                                                                                                                                | W154–W156 |
|          | <b>Standard and generalized McDonald–Kreitman test: a website to detect selection by comparing different classes of DNA sites</b> | R.Egea, S.Casillas and A.Barbadilla                                                                                                                               | W157–W162 |
|          | <b>IDT SciTools: a suite for analysis and design of nucleic acid oligomers</b>                                                    | R.Owczarzy, A.V.Tataurov, Y.Wu, J.A.Manthey, K.A.McQuisten, H.G.Almabrazi, K.F.Pedersen, Y.Lin, J.Garretson, N.O.McEntaggart, C.A.Sailor, R.B.Dawson and A.S.Peek | W163–W169 |
|          | <b>QUMA: quantification tool for methylation analysis</b>                                                                         | Y.Kumaki, M.Oda and M.Okano                                                                                                                                       | W170–W175 |
| <b>S</b> | <b>GeConT 2: gene context analysis for orthologous proteins, conserved domains and metabolic pathways</b>                         | C.E.Martinez-Guerrero, R.Ciria, C.Abreu-Goodger, G.Moreno-Hagelsieb and E.Merino                                                                                  | W176–W180 |
|          | <b>The CGView Server: a comparative genomics tool for circular genomes</b>                                                        | J.R.Grant and P.Stothard                                                                                                                                          | W181–W184 |
|          | <b>HOMCOS: a server to predict interacting protein pairs and interacting sites by homology modeling of complex structures</b>     | N.Fukuhara and T.Kawabata                                                                                                                                         | W185–W189 |
|          | <b>TarO: a target optimisation system for structural biology</b>                                                                  | I.M.Overton, C.A.J.van Niekerk, L.G.Carter, A.Dawson, D.M.A.Martin, S.Cameron, S.A.McMahon, M.F.White, W.N.Hunter, J.H.Naismith and G.J.Barton                    | W190–W196 |
|          | <b>The Jpred 3 secondary structure prediction server</b>                                                                          | C.Cole, J.D.Barber and G.J.Barton                                                                                                                                 | W197–W201 |

*Continued*

|          |                                                                                                                                |                                                                                                                                                                                |           |
|----------|--------------------------------------------------------------------------------------------------------------------------------|--------------------------------------------------------------------------------------------------------------------------------------------------------------------------------|-----------|
|          | <b>PROTEUS2: a web server for comprehensive protein structure prediction and structure-based annotation</b>                    | S.Montgomerie, J.A.Cruz, S.Shrivastava, D.Arndt, M.Berjanskii and D.S.Wishart                                                                                                  | W202–W209 |
| <b>S</b> | <b>MolAxis: a server for identification of channels in macromolecules</b>                                                      | E.Yaffe, D.Fishelovitch, H.J.Wolfson, D.Halperin and R.Nussinov                                                                                                                | W210–W215 |
|          | <b>LocalMove: computing on-lattice fits for biopolymers</b>                                                                    | Y.Ponty, R.Istrate, E.Porcelli and P.Clote                                                                                                                                     | W216–W222 |
|          | <b>PharmaGist: a webserver for ligand-based pharmacophore detection</b>                                                        | D.Schneidman-Duhovny, O.Dror, Y.Inbar, R.Nussinov and H.J.Wolfson                                                                                                              | W223–W228 |
|          | <b>FireDock: a web server for fast interaction refinement in molecular docking</b>                                             | E.Mashiach, D.Schneidman-Duhovny, N.Andrusier, R.Nussinov and H.J.Wolfson                                                                                                      | W229–W232 |
|          | <b>The RosettaDock server for local protein–protein docking</b>                                                                | S.Lyskov and J.J.Gray                                                                                                                                                          | W233–W238 |
| <b>S</b> | <b>Domain Hierarchy and closed Loops (DHcL): a server for exploring hierarchy of protein domain structure</b>                  | G.Koczyk and I.N.Berezovsky                                                                                                                                                    | W239–W245 |
|          | <b>pFlexAna: detecting conformational changes in remotely related proteins</b>                                                 | A.Nigham, L.Tucker-Kellogg, I.Mihalek, C.Verma and D.Hsu                                                                                                                       | W246–W251 |
|          | <b>soaPDB: a web application for searching the Protein Data Bank, organizing results, and receiving automatic email alerts</b> | C.A.Lesburg and J.S.Duca                                                                                                                                                       | W252–W254 |
|          | <b>SEQATOMS: a web tool for identifying missing regions in PDB in sequence context</b>                                         | B.W.Brandt, J.Heringa and J.A.M.Leunissen                                                                                                                                      | W255–W259 |
|          | <b>MultiBind and MAPPIS: webserver for multiple alignment of protein 3D-binding sites and their interactions</b>               | A.Shulman-Peleg, M.Shatsky, R.Nussinov and H.J.Wolfson                                                                                                                         | W260–W264 |
|          | <b>KFC Server: interactive forecasting of protein interaction hot spots</b>                                                    | S.J.Darnell, L.LeGault and J.C.Mitchell                                                                                                                                        | W265–W269 |
| <b>S</b> | <b>PBEQ-Solver for online visualization of electrostatic potential of biomolecules</b>                                         | S.Jo, M.Vargyas, J.Vasko-Szedlar, B.Roux and W.Im                                                                                                                              | W270–W275 |
|          | <b>webPIPSA: a web server for the comparison of protein interaction properties</b>                                             | S.Richter, A.Wenzel, M.Stein, R.R.Gabdoulline and R.C.Wade                                                                                                                     | W276–W280 |
|          | <b>GLUE-IT and PEDEL-AA: new programmes for analyzing protein diversity in randomized libraries</b>                            | A.E.Firth and W.M.Patrick                                                                                                                                                      | W281–W285 |
|          | <b>The Predikin webserver: improved prediction of protein kinase peptide specificity using structural information</b>          | N.F.W.Saunders and B.Kobe                                                                                                                                                      | W286–W290 |
|          | <b>EIDS: catalytic site prediction based on 1D signatures of concurrent conservation</b>                                       | T.-Y.Chien, D.T.-H.Chang, C.-Y.Chen, Y.-Z.Weng and C.-M.Hsu                                                                                                                    | W291–W296 |
|          | <b>FFPred: an integrated feature-based function prediction server for vertebrate proteomes</b>                                 | A.E.Lobley, T.Nugent, C.A.Orengo and D.T.Jones                                                                                                                                 | W297–W302 |
|          | <b>3D-Fun: predicting enzyme function from structure</b>                                                                       | M.von Grothuss, D.Plewczynski, G.Vriend and L.Rychlewski                                                                                                                       | W303–W307 |
|          | <b>GEPAS, a web-based tool for microarray data analysis and interpretation</b>                                                 | J.Tárraga, I.Medina, J.Carbonell, J.Huerta-Cepas, P.Minguez, E.Alloza, F.Al-Shahrour, S.Vegas-Azcárate, S.Goetz, P.Escobar, F.García-García, A.Conesa, D.Montaner and J.Dopazo | W308–W314 |
|          | <b>AMIC@: All Microarray Clusterings @ once</b>                                                                                | F.Geraci, M.Pellegrini and M.E.Renda                                                                                                                                           | W315–W319 |

*Continued*

|          |                                                                                                                                                     |                                                                                                                  |           |
|----------|-----------------------------------------------------------------------------------------------------------------------------------------------------|------------------------------------------------------------------------------------------------------------------|-----------|
| <i>S</i> | <b>GeneCAT—novel webtools that combine BLAST and co-expression analyses</b>                                                                         | M.Mutwil, J.Øbro, W.G.T.Willats and S.Persson                                                                    | W320–W326 |
|          | <b>Microarray retriever: a web-based tool for searching and large scale retrieval of public microarray data</b>                                     | A.E.Ivliev, P.A.C.'t Hoen, M.P.Villierius, J.T.den Dunnen and B.W.Brandt                                         | W327–W331 |
|          | <b>MADNet: microarray database network web server</b>                                                                                               | I.Šegota, N.Bartoniček and K.Vlahoviček                                                                          | W332–W335 |
|          | <b>GenoWatch: a disease gene mining browser for association study</b>                                                                               | Y.-H.Chen, C.-K.Liu, S.-C.Chang, Y.-J.Lin, M.-F.Tsai, Y.-T.Chen and A.Yao                                        | W336–W340 |
|          | <b>Babelomics: advanced functional profiling of transcriptomics, proteomics and genomics experiments</b>                                            | F.Al-Shahrour, J.Carbonell, P.Minguez, S.Goetz, A.Conesa, J.Tárraga, I.Medina, E.Alloza, D.Montaner and J.Dopazo | W341–W346 |
| <i>S</i> | <b>ProfCom: a web tool for profiling the complex functionality of gene groups identified from high-throughput data</b>                              | A.V.Antonov, T.Schmidt, Y.Wang and H.W.Mewes                                                                     | W347–W351 |
| <i>S</i> | <b>Onto-CC: a web server for identifying Gene Ontology conceptual clusters</b>                                                                      | R.Romero-Zaliz, C.del Val, J.P.Cobb and I.Zwir                                                                   | W352–W357 |
| <i>S</i> | <b>GOEAST: a web-based software toolkit for Gene Ontology enrichment analysis</b>                                                                   | Q.Zheng and X.-J.Wang                                                                                            | W358–W363 |
|          | <b>PaLS: filtering common literature, biological terms and pathway information</b>                                                                  | A.Alibés, A.Cañada and R.Díaz-Uriarte                                                                            | W364–W367 |
| <i>S</i> | <b>SerbGO: searching for the best GO tool</b>                                                                                                       | J.L.Mosquera and A.Sánchez-Pla                                                                                   | W368–W371 |
|          | <b>The Ontology Lookup Service: more data and better tools for controlled vocabulary queries</b>                                                    | R.G.Côté, P.Jones, L.Martens, R.Apweiler and H.Hermjakob                                                         | W372–W376 |
| <i>S</i> | <b>ENDEAVOUR update: a web resource for gene prioritization in multiple species</b>                                                                 | L.-C.Tranchevent, R.Barriot, S.Yu, S.Van Vooren, P.Van Loo, B.Coessens, B.De Moor, S.Aerts and Y.Moreau          | W377–W384 |
|          | <b>BioLit: integrating biological literature with databases</b>                                                                                     | J.L.Fink, S.Kushch, P.R.Williams and P.E.Bourne                                                                  | W385–W389 |
| <i>S</i> | <b>BIOSMILE web search: a web application for annotating biomedical entities and relations</b>                                                      | H.-J.Dai, C.-H.Huang, R.T.K.Lin, R.T.-H.Tsai and W.-L.Hsu                                                        | W390–W398 |
|          | <b>PolySearch: a web-based text mining system for extracting relationships between human diseases, genes, mutations, drugs and metabolites</b>      | D.Cheng, C.Knox, N.Young, P.Stothard, S.Damaraju and D.S.Wishart                                                 | W399–W405 |
|          | <b>CoPub: a literature-based keyword enrichment tool for microarray data analysis</b>                                                               | R.Frijters, B.Heupers, P.van Beek, M.Bouwhuis, R.van Schaik, J.de Vlieg, J.Polman and W.Alkema                   | W406–W410 |
|          | <b>PIE: an online prediction system for protein–protein interactions from text</b>                                                                  | S.Kim, S.-Y.Shin, I.-H.Lee, S.-J.Kim, R.Sriram and B.-T.Zhang                                                    | W411–W415 |
| <i>S</i> | <b>E3Miner: a text mining tool for ubiquitin-protein ligases</b>                                                                                    | H.Lee, G.-S.Yi and J.C.Park                                                                                      | W416–W422 |
|          | <b>KEGG Atlas mapping for global analysis of metabolic pathways</b>                                                                                 | S.Okuda, T.Yamada, M.Hamajima, M.Itoh, T.Katayama, P.Bork, S.Goto and M.Kanehisa                                 | W423–W426 |
| <i>S</i> | <b>The University of Minnesota pathway prediction system: predicting metabolic logic</b>                                                            | L.B.M.Ellis, J.Gao, K.Fenner and L.P.Wackett                                                                     | W427–W432 |
| <i>S</i> | <b>Comparative Pathway Analyzer—a web server for comparative analysis, clustering and visualization of metabolic networks in multiple organisms</b> | S.Oehm, D.Gilbert, A.Tauch, J.Stoye and A.Goesmann                                                               | W433–W437 |
|          | <b>Hubba: hub objects analyzer—a framework of interactome hubs identification for network biology</b>                                               | C.-Y.Lin, C.-H.Chin, H.-H.Wu, S.-H.Chen, C.-W.Ho and M.-T.Ko                                                     | W438–W443 |

*Continued*

|          |                                                                                                                                      |                                                                                                                                                                                                                          |           |
|----------|--------------------------------------------------------------------------------------------------------------------------------------|--------------------------------------------------------------------------------------------------------------------------------------------------------------------------------------------------------------------------|-----------|
|          | <b>NeAT: a toolbox for the analysis of biological networks, clusters, classes and pathways</b>                                       | S.Brohée, K.Faust, G.Lima-Mendez, O.Sand, R.Janky, G.Vanderstocken, Y.Deville and J.van Helden                                                                                                                           | W444–W451 |
|          | <b>GraphWeb: mining heterogeneous biological networks for gene modules with functional significance</b>                              | J.Reimand, L.Tooming, H.Peterson, P.Adler and J.Vilo                                                                                                                                                                     | W452–W459 |
| <i>S</i> | <b>ProdoNet: identification and visualization of prokaryotic gene regulatory and metabolic networks</b>                              | J.Klein, S.Leupold, R.Münch, C.Pommerenke, T.Johl, U.Kärst, L.Jänsch, D.Jahn and I.Retter                                                                                                                                | W460–W464 |
|          | <b>Phylogeny.fr: robust phylogenetic analysis for the non-specialist</b>                                                             | A.Dereeper, V.Guignon, G.Blanc, S.Audic, S.Buffet, F.Chevenet, J.-F.Dufayard, S.Guindon, V.Lefort, M.Lescot, J.-M.Claverie and O.Gascuel                                                                                 | W465–W469 |
|          | <b>Signature, a web server for taxonomic characterization of sequence samples using signature genes</b>                              | B.E.Dutilh, Y.He, M.L.Hekkelman and M.A.Huynen                                                                                                                                                                           | W470–W474 |
|          | <b>OGtree: a tool for creating genome trees of prokaryotes based on overlapping genes</b>                                            | L.-W.Jiang, K.-L.Lin and C.L.Lu                                                                                                                                                                                          | W475–W480 |
|          | <b>MassTRIX: mass translator into pathways</b>                                                                                       | K.Suhre and P.Schmitt-Kopplin                                                                                                                                                                                            | W481–W484 |
|          | <b>ISPIDER Central: an integrated database web-server for proteomics</b>                                                             | J.A.Siepen, K.Belhajjame, J.N.Selley, S.M.Embury, N.W.Paton, C.A.Goble, S.G.Oliver, R.Stevens, L.Zamboulis, N.Martin, A.Poulovassillis, P.Jones, R.Côté, H.Hermjakob, M.M.Pentony, D.T.Jones, C.A.Orengo and S.J.Hubbard | W485–W490 |
|          | <b>MassNet: a functional annotation service for protein mass spectrometry data</b>                                                   | D.Park, B.-C.Kim, S.-W.Cho, S.-J.Park, J.-S.Choi, S.I.Kim, J.Bhak and S.Lee                                                                                                                                              | W491–W495 |
|          | <b>CS23D: a web server for rapid protein structure generation using NMR chemical shifts and sequence data</b>                        | D.S.Wishart, D.Arndt, M.Berjanskii, P.Tang, J.Zhou and G.Lin                                                                                                                                                             | W496–W502 |
|          | <b>IMGT/V-QUEST: the highly customized and integrated system for IG and TR standardized V-J and V-D-J sequence analysis</b>          | X.Brochet, M.-P.Lefranc and V.Giudicelli                                                                                                                                                                                 | W503–W508 |
| <i>S</i> | <b>NetMHC-3.0: accurate web accessible predictions of human, mouse and monkey MHC class I affinities for peptides of length 8–11</b> | C.Lundegaard, K.Lamberth, M.Harndahl, S.Buus, O.Lund and M.Nielsen                                                                                                                                                       | W509–W512 |
|          | <b>Immune epitope database analysis resource (IEDB-AR)</b>                                                                           | Q.Zhang, P.Wang, Y.Kim, P.Haste-Andersen, J.Beaver, P.E.Bourne, H.-H.Bui, S.Buus, S.Frankild, J.Greenbaum, O.Lund, C.Lundegaard, M.Nielsen, J.Ponomarenko, A.Sette, Z.Zhu and B.Peters                                   | W513–W518 |
| <i>S</i> | <b>EpiToolKit—a web server for computational immunomics</b>                                                                          | M.Feldhahn, P.Thiel, M.M.Schuler, N.Hillen, S.Stevanović, H.-G.Rammensee and O.Kohlbacher                                                                                                                                | W519–W522 |
|          | <b>bioNMF: a web-based tool for nonnegative matrix factorization in biology</b>                                                      | E.Mejía-Roa, P.Carmona-Saez, R.Nogales, C.Vicente, M.Vázquez, X.Y.Yang, C.García, F.Tirado and A.Pascual-Montano                                                                                                         | W523–W528 |

*S*, Supplementary Material available at NAR Online
